# Supplementary material for: Decoupled temperature and pressure hydrothermal synthesis of carbon sub-micron spheres from cellulose
Source: PubMed Central journal article supplement (PMC9232491; doi:10.1038/s41467-022-31352-x), 2022-06-24
Supplement: 41467_2022_31352_MOESM3_ESM.pdf [file 41467_2022_31352_MOESM3_ESM.pdf]

## **Description of Additional Supplementary Files**

File Name: Supplementary Data 1

Description: **Detailed data of life cycle assessment.**

Sheet A: Liquor component

Sheet B: Energy Efficiency

Sheet C: Transport

Sheet D: LCI

Sheet E: Coal substitution LCIA

Sheet F: Soil amendment LCIA

Sheet G: RS GWP China
